# Supplementary material
Source: Springer Nature journal article supplement (https://www.springermedizin.de/resource/supplementary/12990_2010_385_MOESM6_ESM.pdf/9613156)

**A**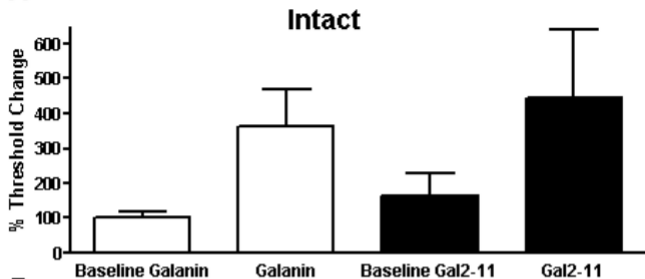**B**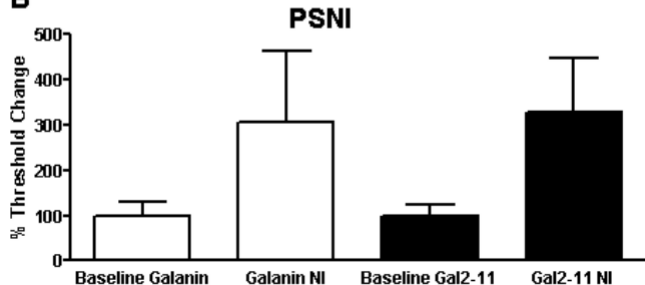

Supplement: MOESM6 [file 9613156]
